# Supplementary material for: In vivo evaluation of the anti-obesity effects of combinations of Monascus pigment derivatives
Source: Royal Society of Chemistry journal article supplement (doi:10.1039/c9ra08036h), 2020-01-01
Supplement: c9ra08036h1.pdf [file c9ra08036h1.pdf]

**Supplementary Information**

***In vivo* evaluation of the anti-obesity effects of combinations of  
*Monascus* pigment derivatives**

Deokyeong Choe,<sup>‡a</sup> Hyun Ho Jung,<sup>‡b</sup> Daehwan Kim,<sup>c</sup> Chul Soo Shin,<sup>b</sup> Tony Vaughn Johnstona  
and Seockmo Ku<sup>\*a</sup>

*<sup>a</sup>Fermentation Science Program, School of Agriculture, College of Basic and Applied Sciences,  
Middle Tennessee State University, Murfreesboro, TN 37132, USA*

*<sup>b</sup>Department of Biotechnology, College of Life Science and Biotechnology, Yonsei University,  
Seoul 03722, South Korea*

*<sup>c</sup>Department of Biology, Hood College, Frederick, MD 21701, USA*

\* Corresponding author: seockmo.ku@mtsu.edu

‡ These authors contributed equally.

A

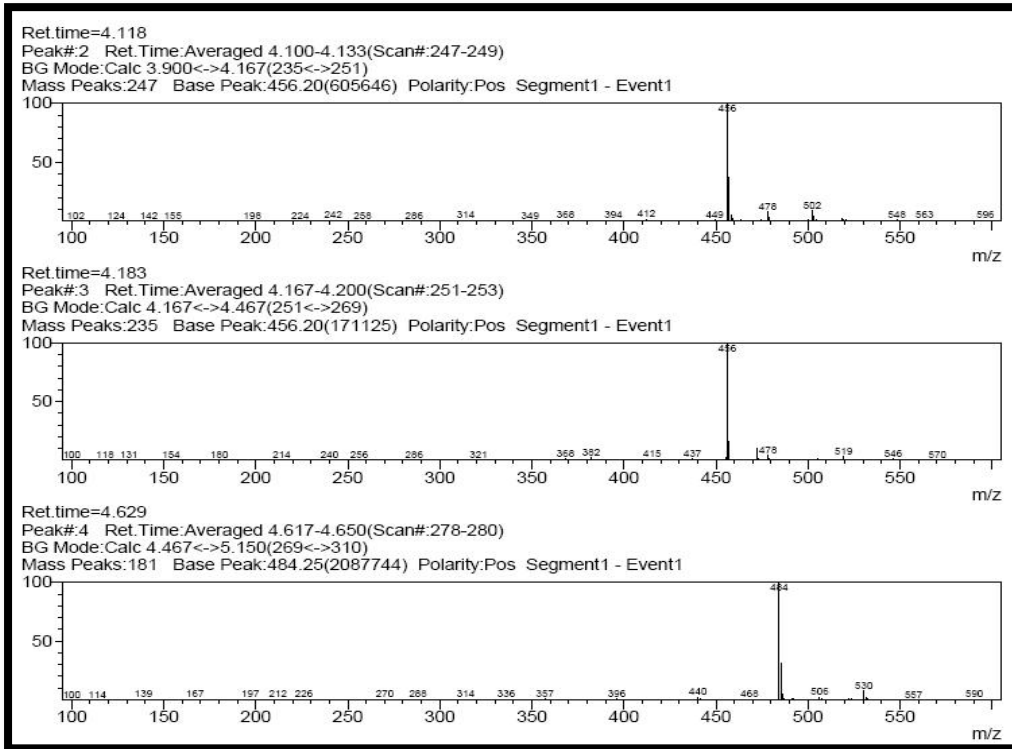

B

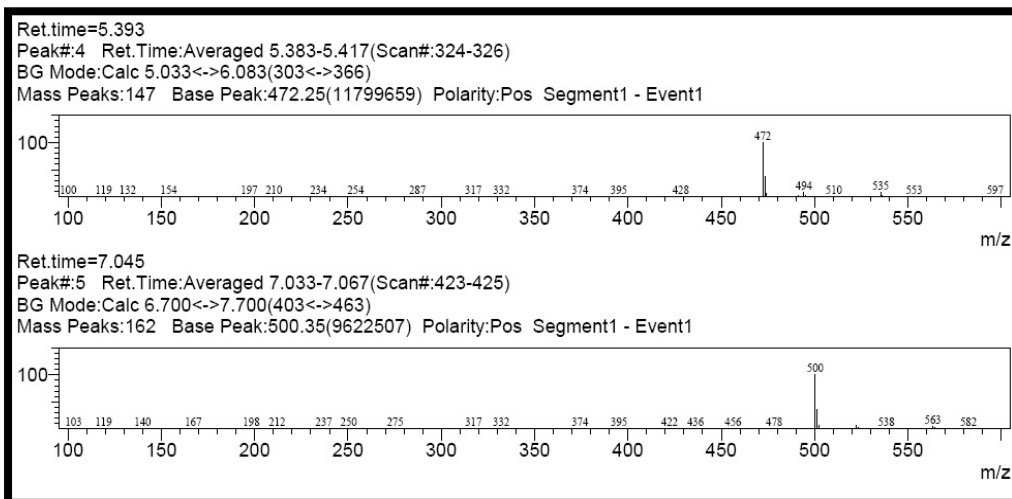

C

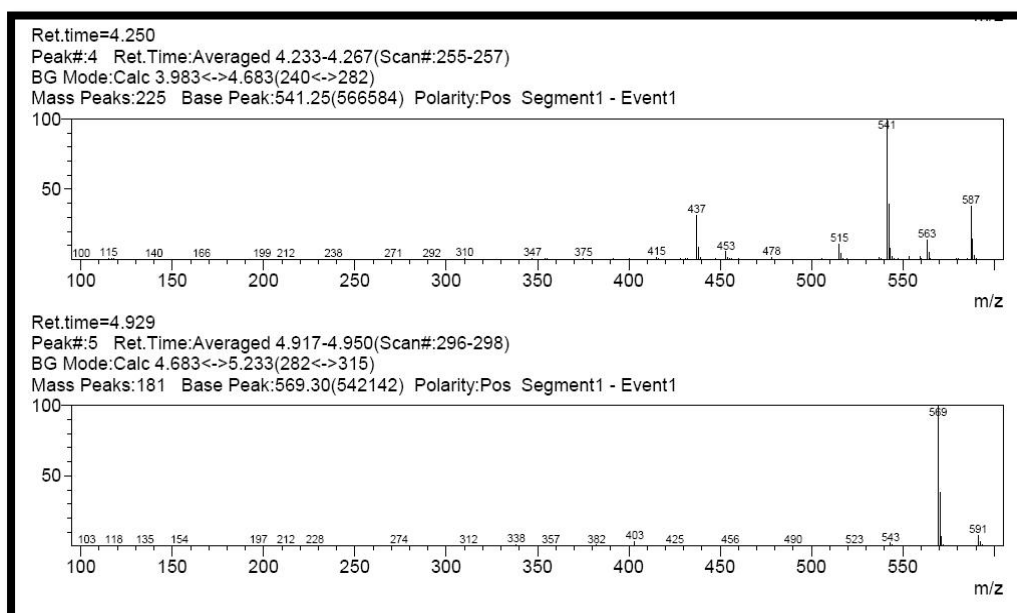

**Figure S1.** LC-MS spectrometric analysis of *Monascus* pigment derivatives.

A: Thr derivative; B: Trp derivative; C: TEA derivative.
